# Supplementary material
Source: HighWire-hosted journal article supplement (https://jnm.snmjournals.org/highwire/filestream/94022/field_highwire_adjunct_files/0/62224_supplemental_materials.pdf)
Supplement: 62224_supplemental_materials.pdf [file 62224_supplemental_materials.pdf]

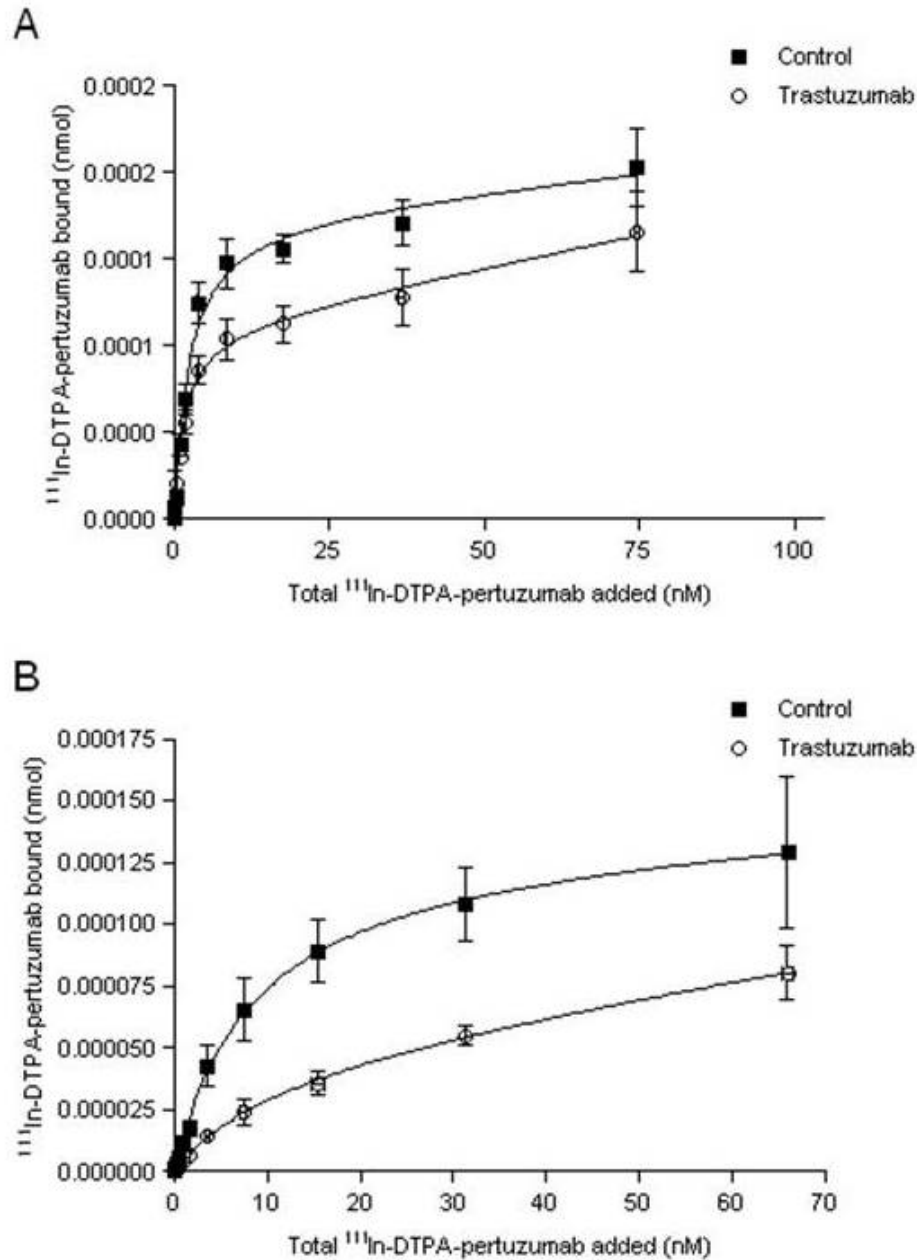

**SUPPLEMENTAL FIGURE 1.** Representative *in vitro* saturation binding curves of  $^{111}\text{In-DTPA-pertuzumab}$  to SKBr-3 (A) or MDA-MB-361 (B) cells treated for 72 h with trastuzumab (14  $\mu\text{g/mL}$ ) and untreated controls. The  $B_{\text{max}}$  values were calculated from the specific binding by fitting a plot of total cell-bound  $^{111}\text{In-DTPA-pertuzumab}$  (nmols) vs. the concentration of total added radioligand (nmols/L) to a 1-site saturation binding model using Prism® Ver. 4.0 software and then mathematically deriving the non-specific binding for subtraction from the total binding.

### SUPPLEMENTAL TABLE 1

Tumor Uptake (%ID/g) of <sup>111</sup>In-DTPA-Pertuzumab of Individual Athymic Mice Implanted Subcutaneously with MDA-MB-361 Human Breast Cancer Xenografts at 72 Hours Post-Injection

| Mouse | 3-Day Treatment |             | 3-Week Treatment |             |
|-------|-----------------|-------------|------------------|-------------|
|       | PBS             | Trastuzumab | PBS              | Trastuzumab |
| 1     | 39.5            | 16.2        | 39.4             | 7.2         |
| 2     | 32.5            | 13.3        | 41.1             | 7.2         |
| 3     | 20.2            | 10.9        | 23.2             | 8.1         |
| 4     | 21.8            | n/a         | n/a              | 7.8         |

n/a: not available

### SUPPLEMENTAL TABLE 2

Immunohistochemical Analysis of Excised MDA-MB-361 Human Breast Cancer Xenografts Stained for HER2

| PBS*    | Trastuzumab 3 days* | Trastuzumab 3 weeks |
|---------|---------------------|---------------------|
| 25 ± 17 | 30 ± 13             | n/a <sup>†</sup>    |

\* Tumors were scored as the percentage of strong, complete membrane staining. Results are presented as the mean ± SD of 3 tumors.

<sup>†</sup> Not applicable. Too few viable tumor cells to assign a score.
